# Supplementary material for: Low Virulence of the Fungi Escovopsis and Escovopsioides to a Leaf-Cutting Ant-Fungus Symbiosis
Source: Front Microbiol. 2021 Jul 29;12:673445. doi: 10.3389/fmicb.2021.673445 (PMC8358438; doi:10.3389/fmicb.2021.673445)
Supplement: Supplementary file 2 [file Table_2.XLSX]

## Sheet: Planilha1
colony	pot	treat	level_colony	days	status
c17	1	control	queen	118	0
c17	2	control	workers	118	0
c17	3	control	garden	11	1
c18	4	control	queen	118	0
c18	5	control	workers	112	1
c18	6	control	garden	11	1
c19	7	control	queen	118	0
c19	8	control	workers	117	1
c19	9	control	garden	11	1
c16	10	Escovopsis	queen	118	0
c16	11	Escovopsis	workers	20	1
c16	12	Escovopsis	garden	11	1
c24	13	Escovopsis	queen	118	0
c24	14	Escovopsis	workers	40	1
c24	15	Escovopsis	garden	11	1
c42	16	Escovopsis	queen	118	0
c42	17	Escovopsis	workers	48	1
c42	18	Escovopsis	garden	11	1
c5	19	Escovopsioides	queen	118	0
c5	20	Escovopsioides	workers	112	1
c5	21	Escovopsioides	garden	11	1
c23	22	Escovopsioides	queen	118	0
c23	23	Escovopsioides	workers	48	1
c23	24	Escovopsioides	garden	11	1
c4	25	Escovopsioides	queen	118	0
c4	26	Escovopsioides	workers	99	1
c4	27	Escovopsioides	garden	11	1
c25	28	Trichoderma	queen	118	0
c25	29	Trichoderma	workers	40	1
c25	30	Trichoderma	garden	11	1
c20	31	Trichoderma	queen	118	0
c20	32	Trichoderma	workers	108	0
c20	33	Trichoderma	garden	11	1
c21	34	Trichoderma	queen	118	0
c21	35	Trichoderma	workers	76	1
c21	36	Trichoderma	garden	11	1
